# Supplementary material
Source: publisher figshare collection journal article supplement (https://frontiersin.figshare.com/ndownloader/files/25159730)

# Figure S4

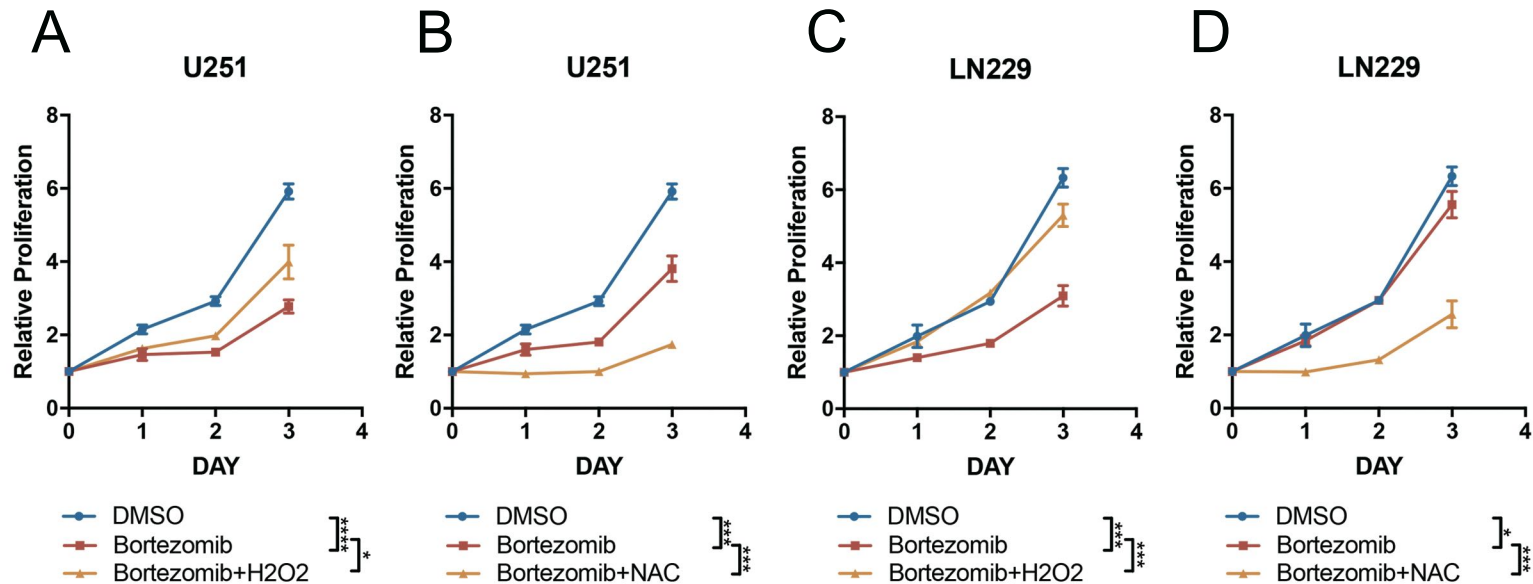

Supplement: Supplementary file [file 25159730]
